# Supplementary material for: In situ sodium chloride template synthesis of cobalt oxide hollow octahedra for lithium-ion batteries
Source: Royal Society of Chemistry journal article supplement (doi:10.1039/c4ra15551c), 2015-01-01
Supplement: c4ra15551c1.pdf [file c4ra15551c1.pdf]

**In-situ Sodium Chloride Template Synthesis of Cobalt Oxide Hollow  
Octahedrons for Lithium-ion Batteries**

Fei Wang\*, Danfei Cheng, Wengang Wang, Yuting Wang, Mingshu Zhao, Shengchun Yang, Xuegang

Lu and Xiaoping Song

School of Science, Key Laboratory of Shaanxi for Advanced Functional Materials and Mesoscopic Physics, State

Key Laboratory for Mechanical Behavior of Materials, Xi'an Jiaotong University, Xi'an 710049, ShaanXi,

People's Republic of China

Tel: +86 29 82663034; Fax: +86 29 82665995; E-mail address: [feiwang@mail.xjtu.edu.cn](mailto:feiwang@mail.xjtu.edu.cn) (Fei  
Wang)

---

Tel: +86 29 82663034; Fax: +86 29 82665995; E-mail address: [feiwang@mail.xjtu.edu.cn](mailto:feiwang@mail.xjtu.edu.cn) (F. Wang)

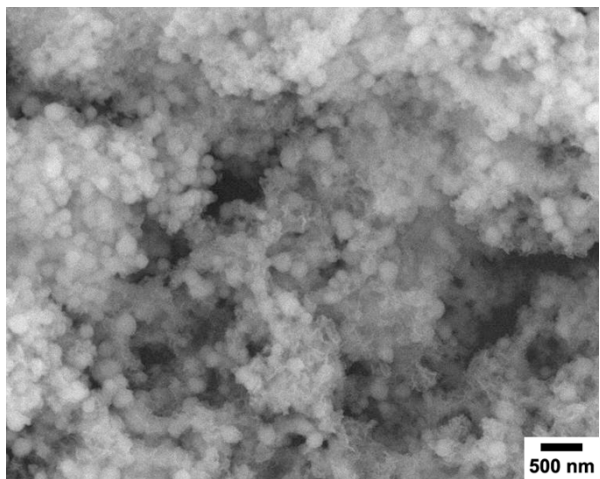

**Figure S1** SEM image of the reaction products without the additional NaCl in synthetic process.
